# Supplementary figures and images for: An insight into the synthesis of novel aryl-substituted alicyclic β-amino acid derivatives through substrate-directed palladium-catalysed regio- and stereoselective cross-coupling
Source: Royal Society of Chemistry journal article supplement (doi:10.1039/c4ra16196c), 2015-01-01

### Supporting Information. Copies of $^1\text{H}$ NMR and $^{13}\text{C}$ NMR spectra

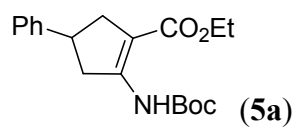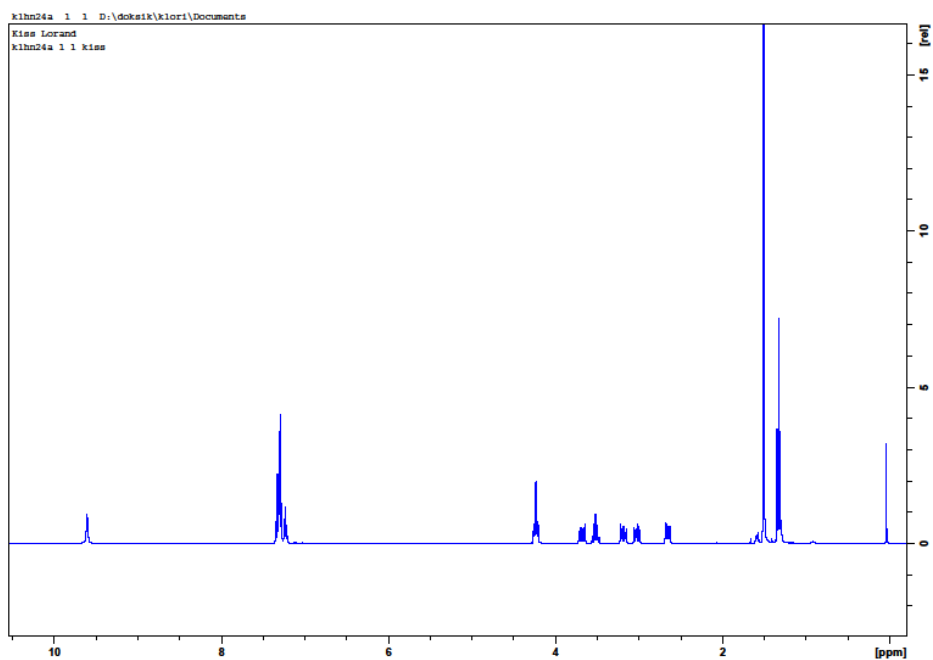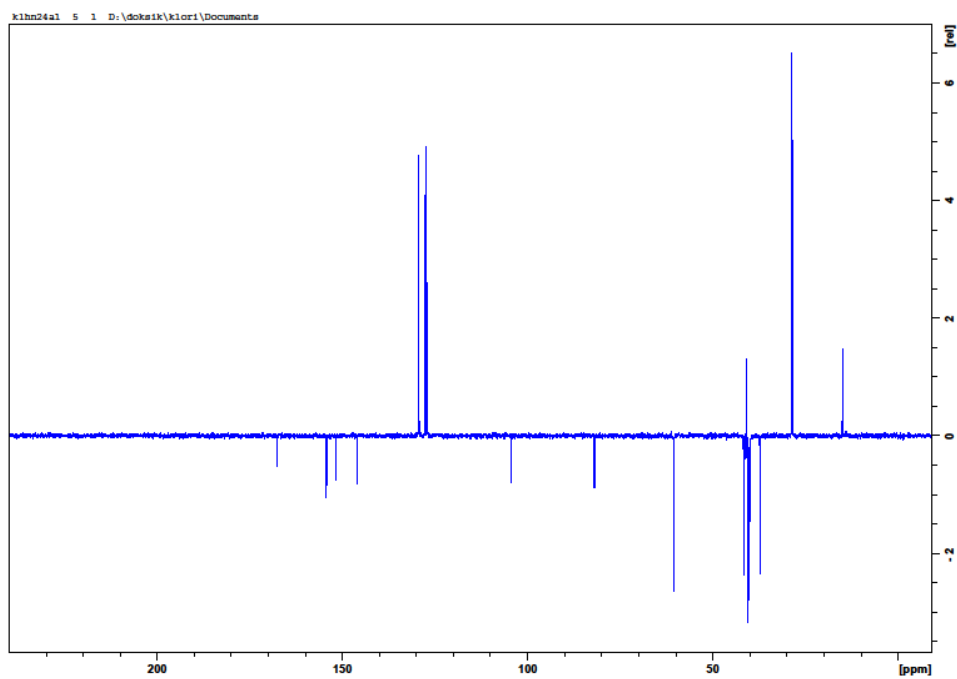

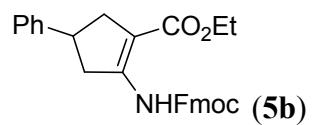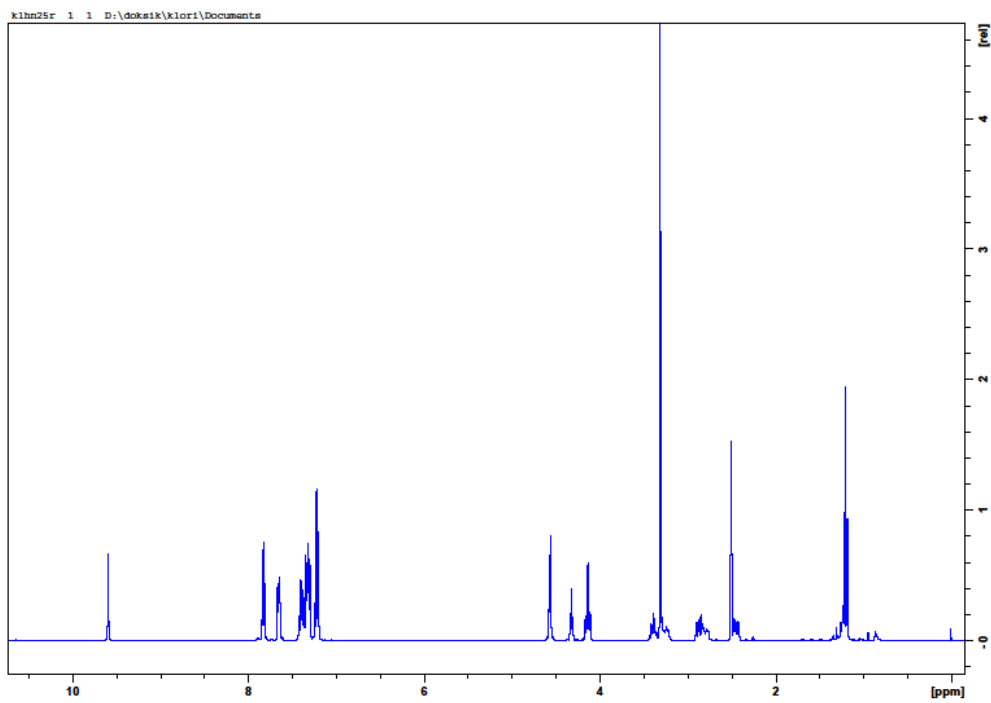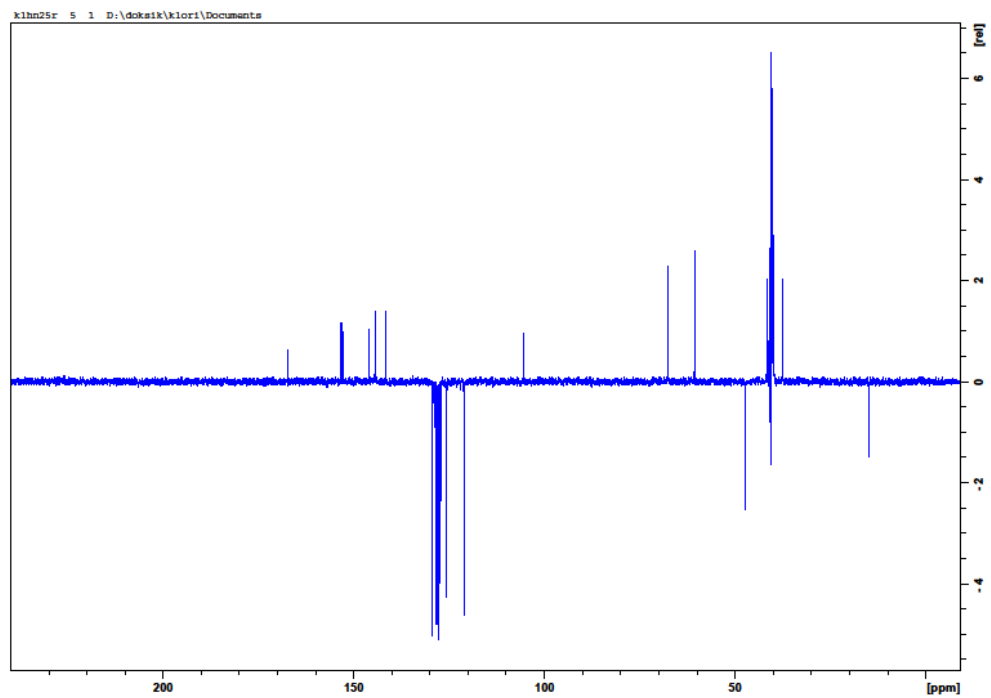

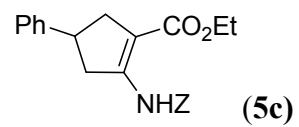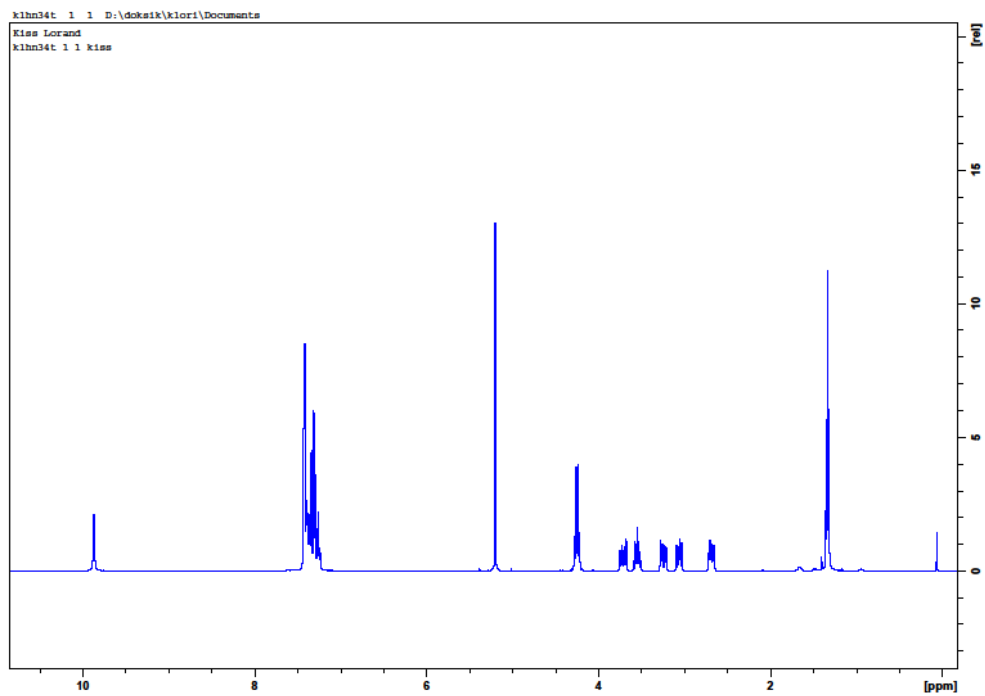

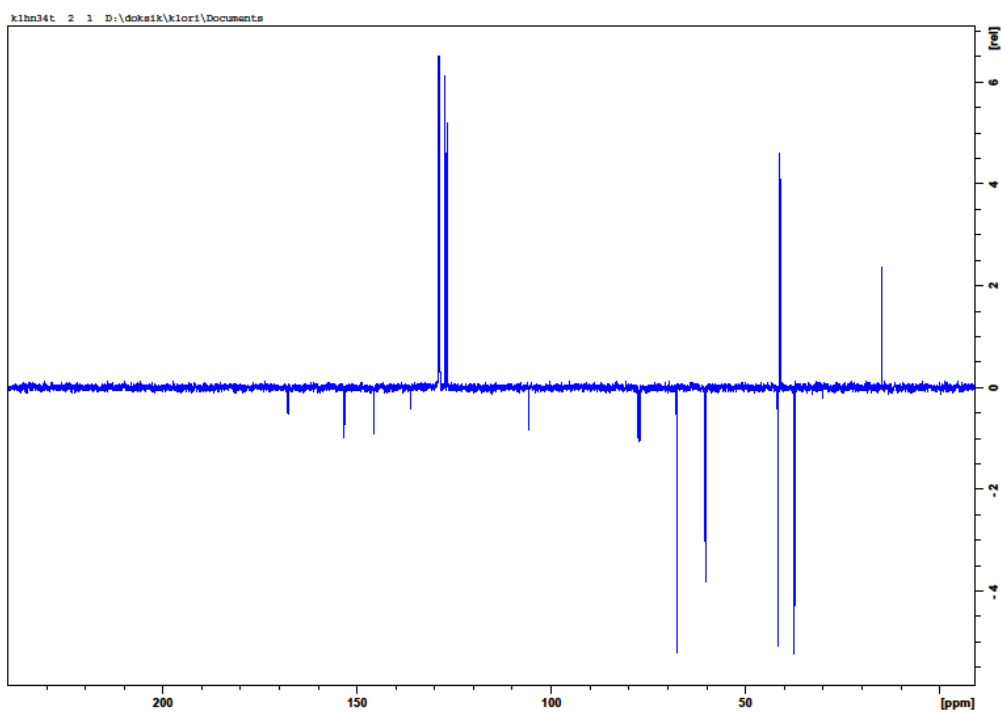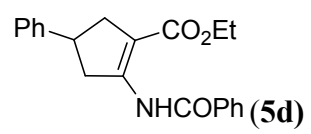

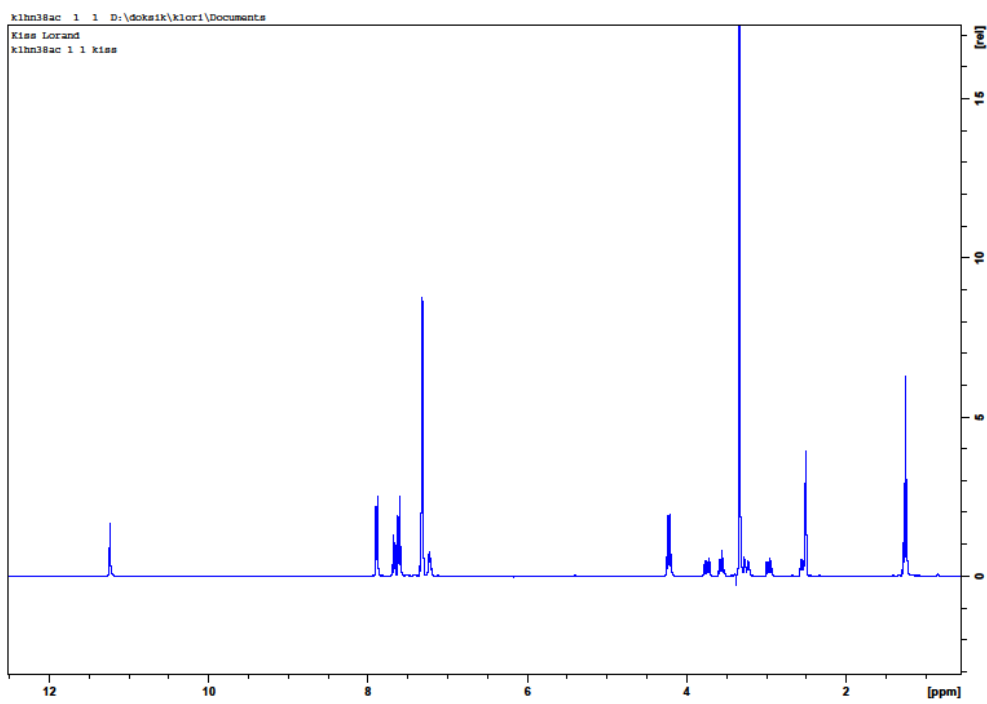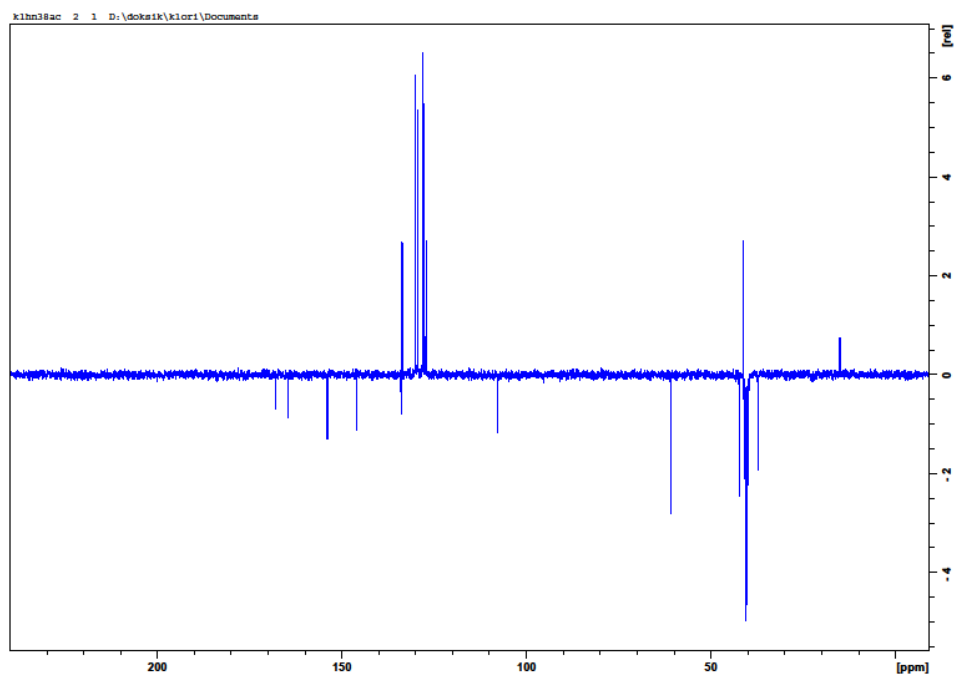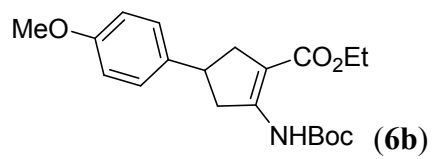

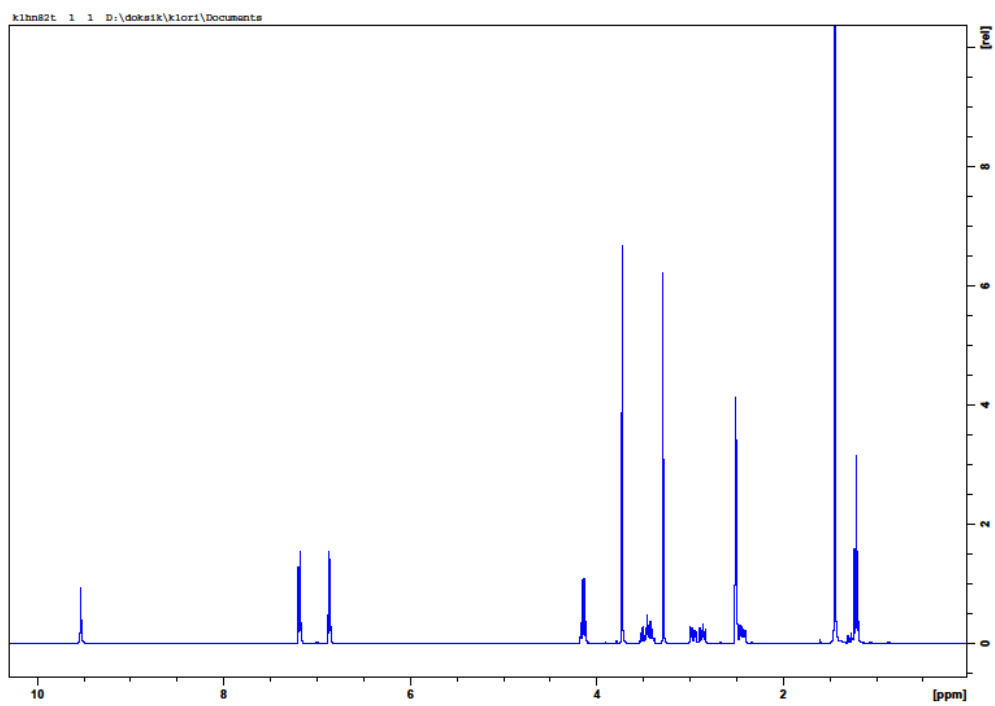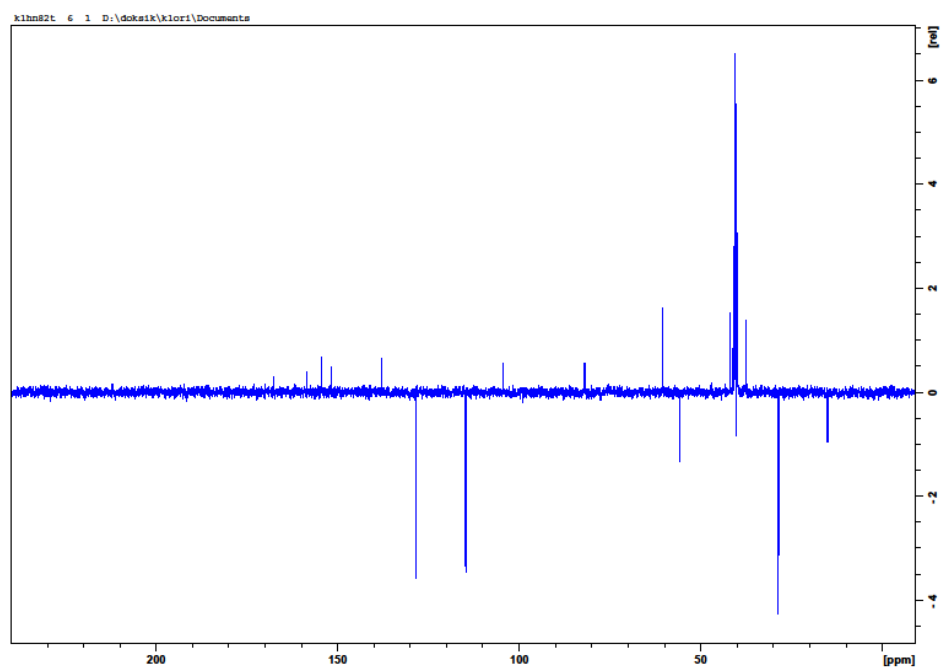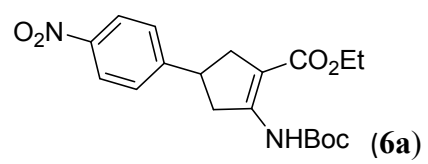

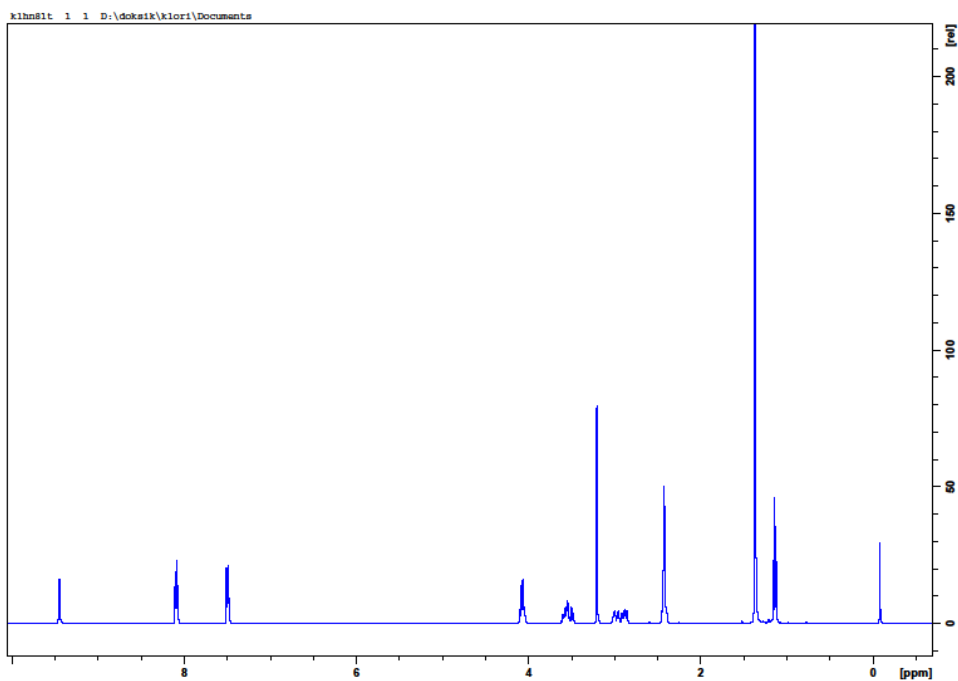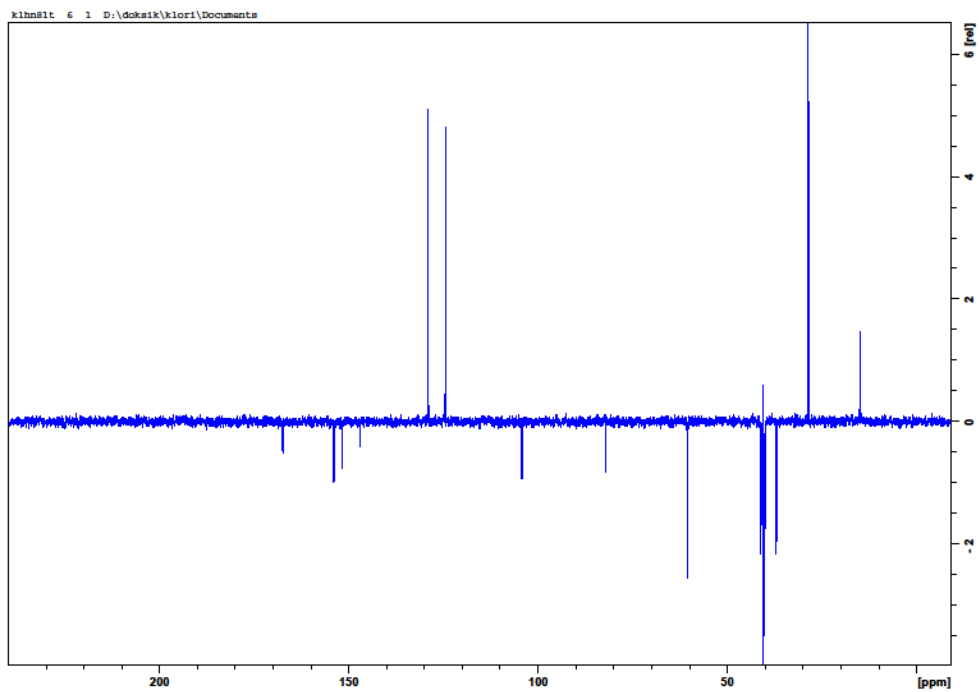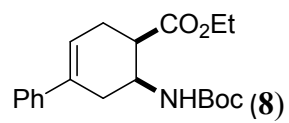

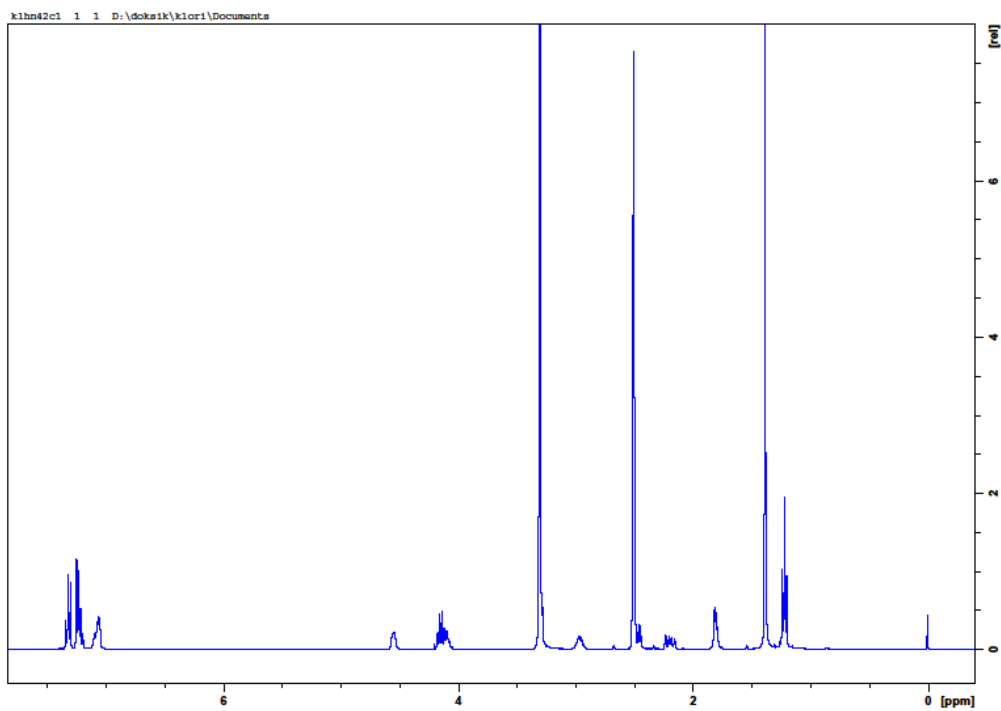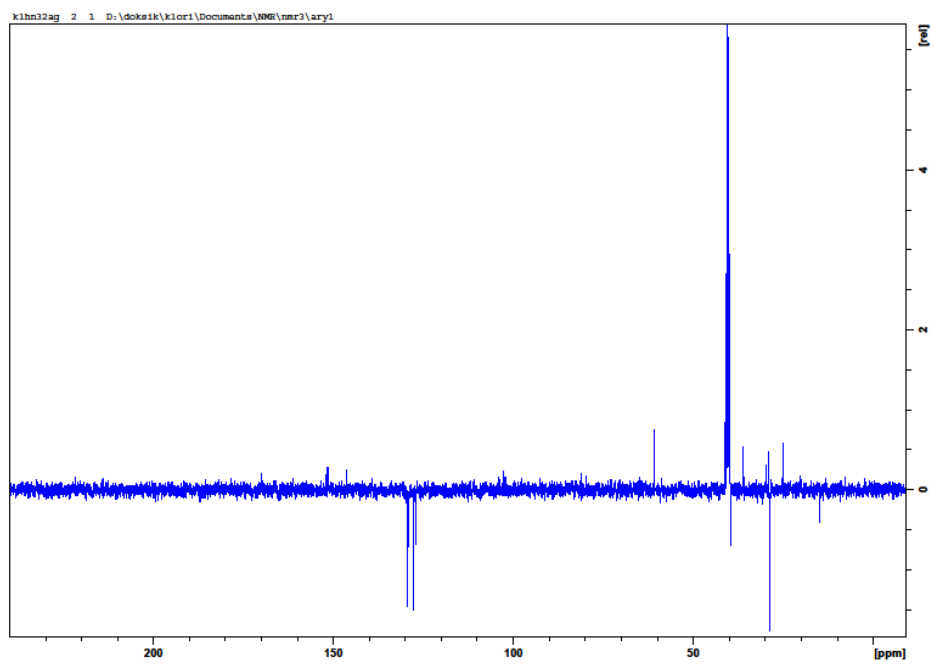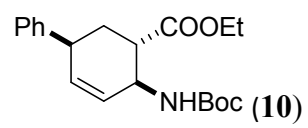



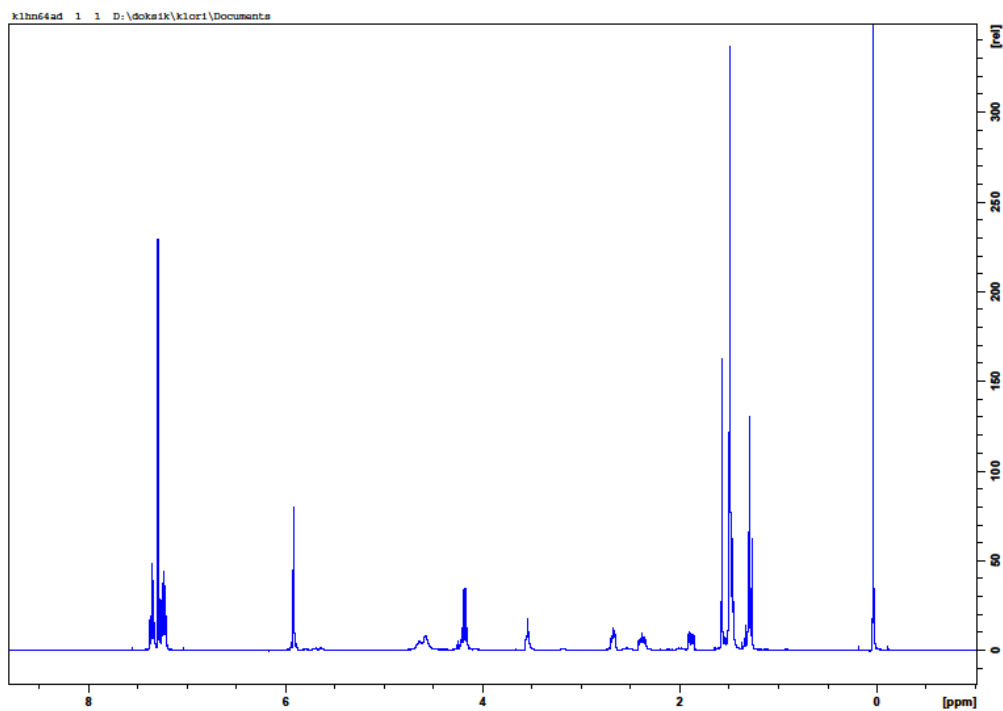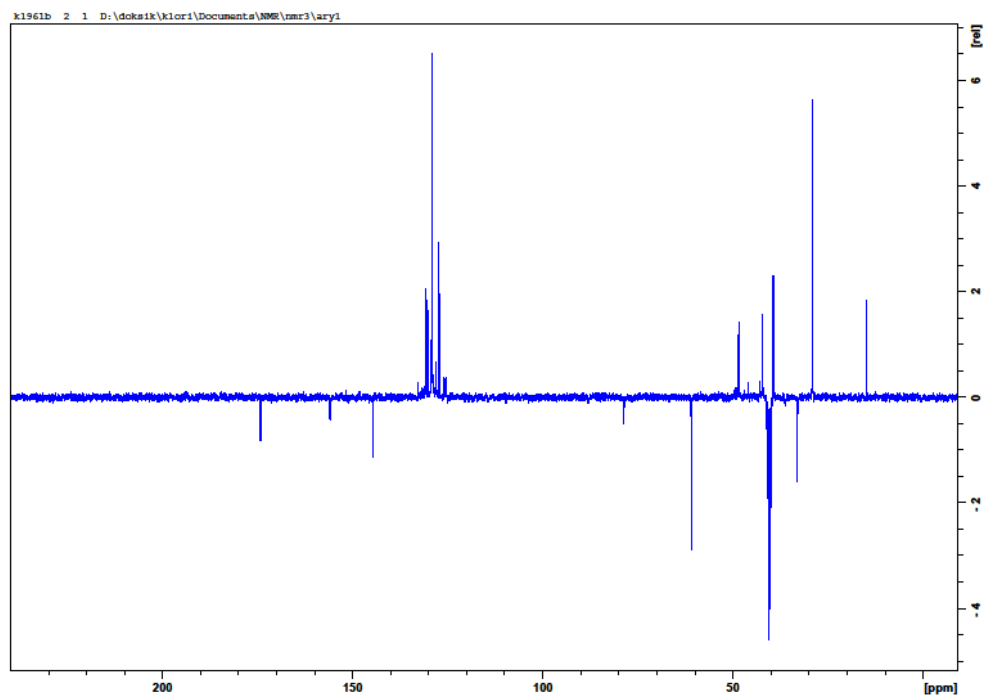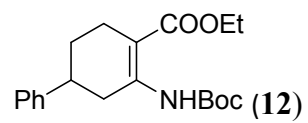

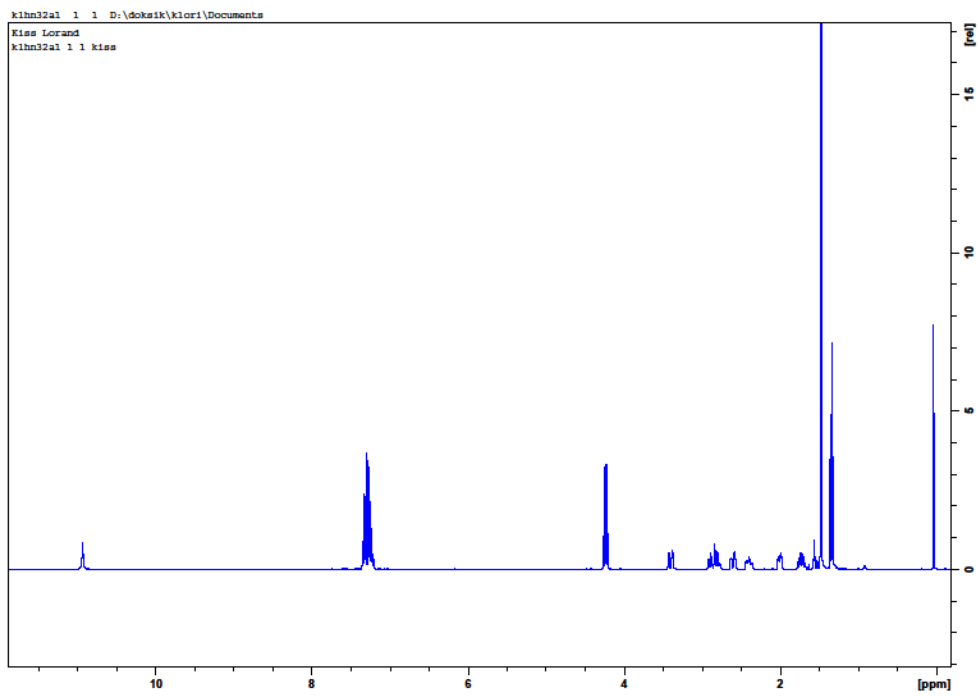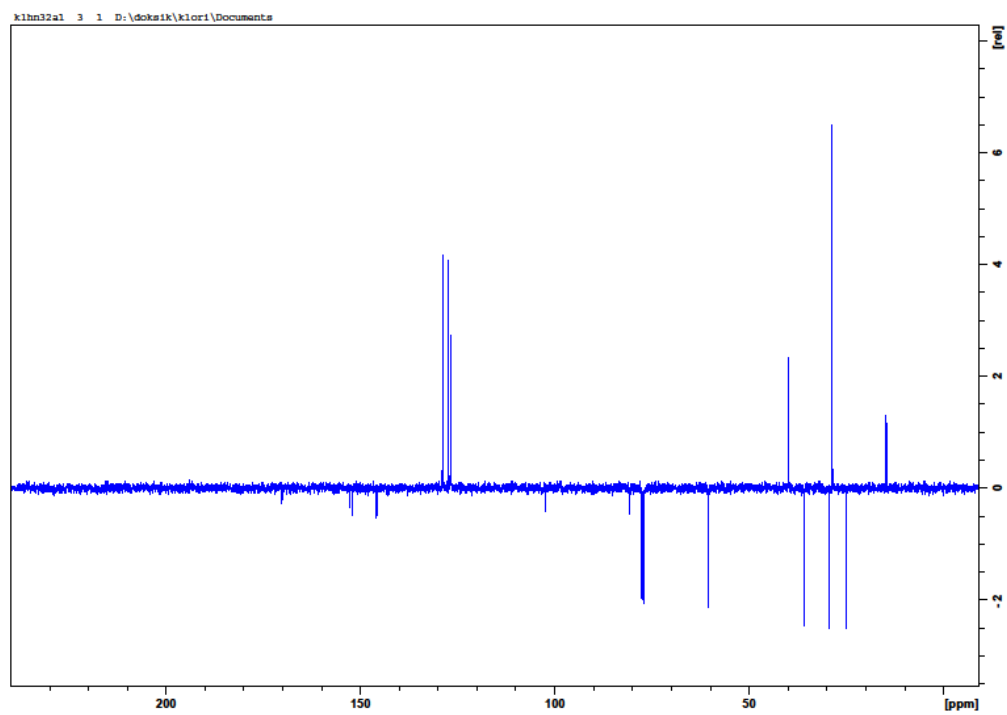

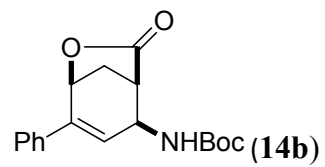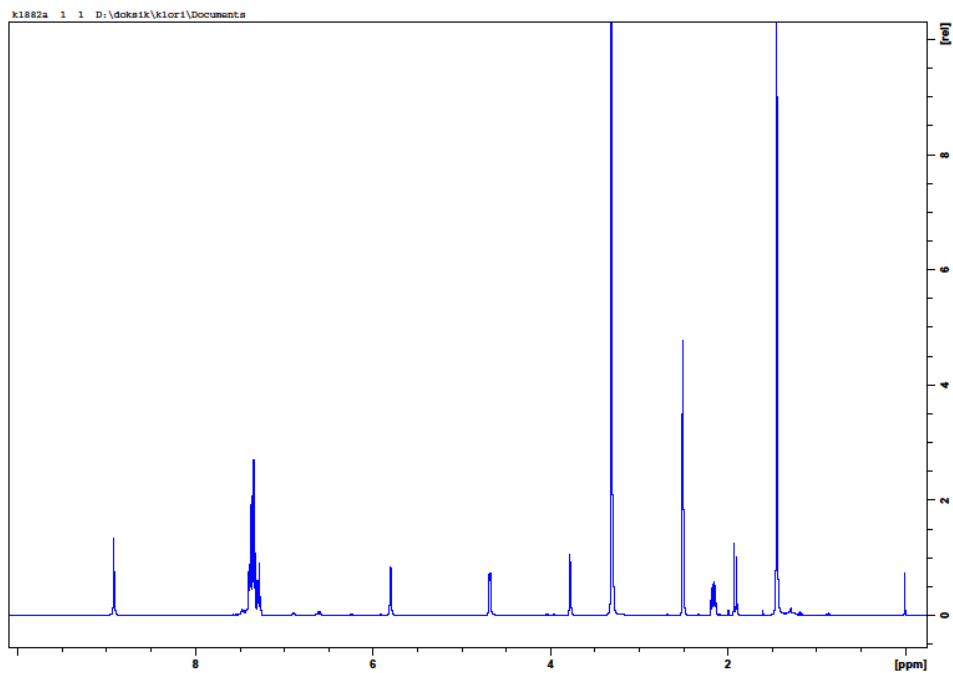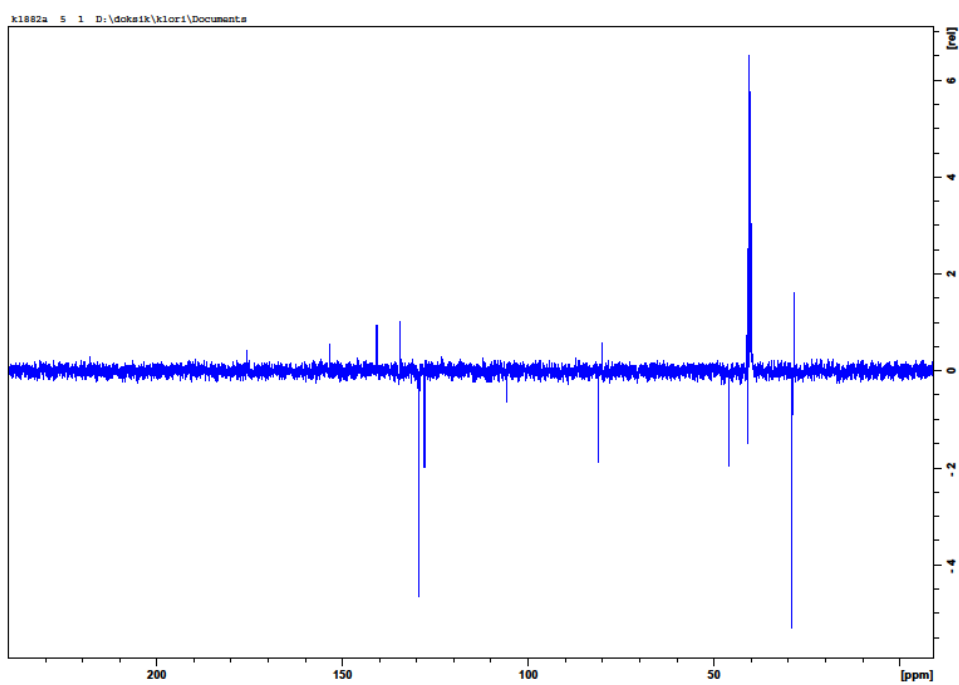

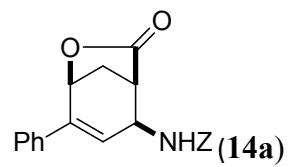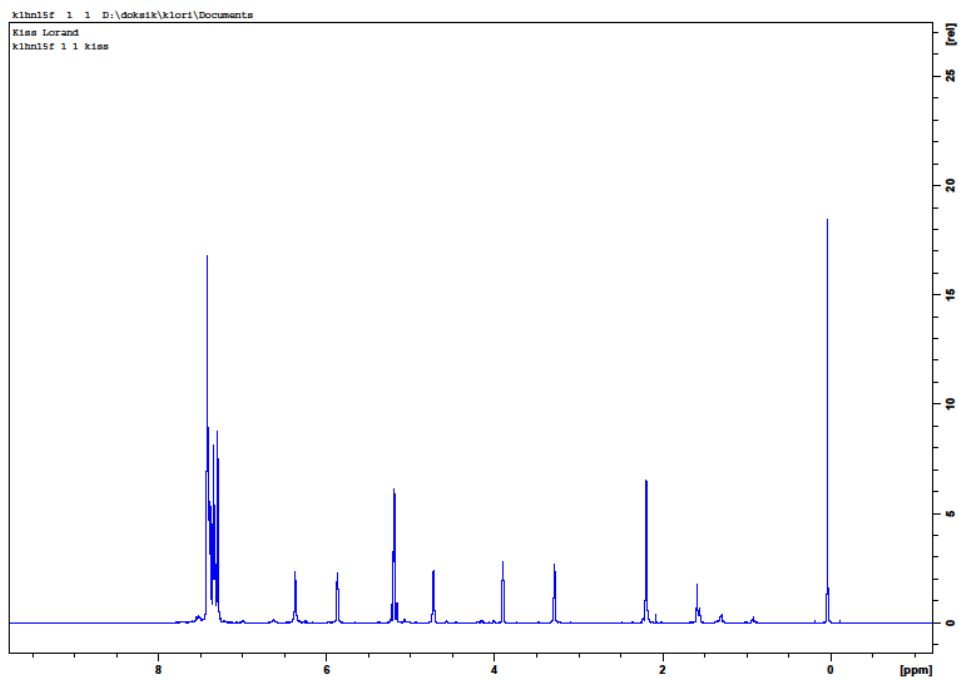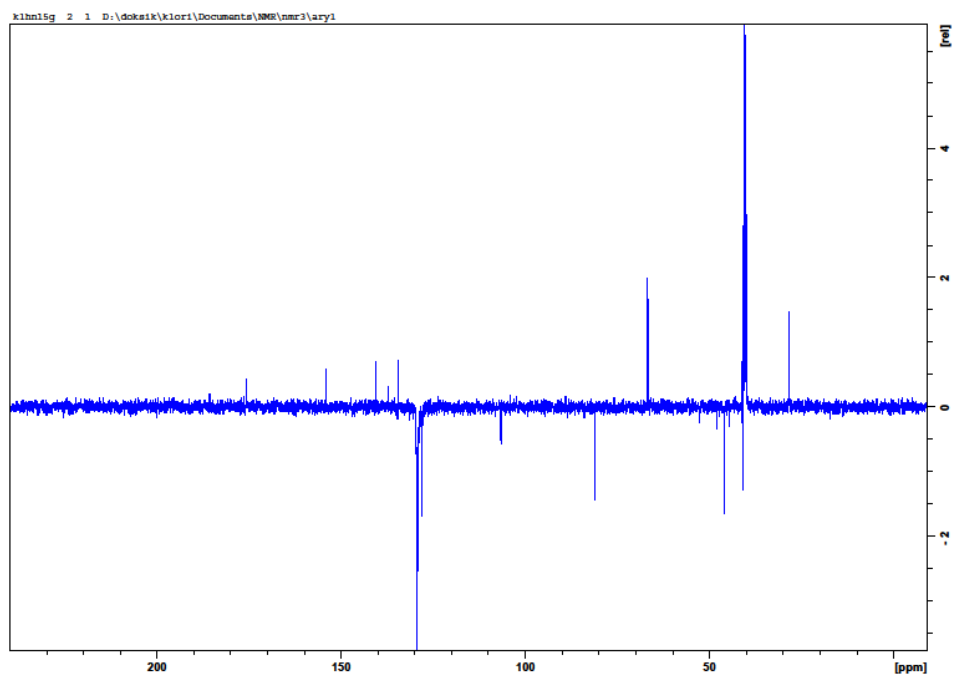

Supplement: c4ra16196c1.pdf [file c4ra16196c1.pdf]
